# Supplementary material for: ω-3 Tear Film Lipids Correlate With Clinical Measures of Dry Eye
Source: PubMed Central journal article supplement — Invest Ophthalmol Vis Sci. 2016 May 3;57(6):2472–8. doi: 10.1167/iovs.16-19131 (PMC4857833; doi:10.1167/iovs.16-19131), 2016-05-03
Supplement: i1552-5783-57-6-2472-s01.pdf [file i1552-5783-57-6-2472-s01.pdf]

**Supplementary Table 1:** Correlations between lipid species recovered from human tears

| <b>Lipid Species</b>   | <b>AA<br/>Pearson/<br/>Spearman</b> | <b>DHA<br/>Pearson/<br/>Spearman</b> | <b>EPA<br/>Pearson/<br/>Spearman</b> | <b>PGE<sub>2</sub><br/>Pearson/<br/>Spearman</b> | <b>HxA<sub>3</sub><br/>Pearson/<br/>Spearman</b> |
|------------------------|-------------------------------------|--------------------------------------|--------------------------------------|--------------------------------------------------|--------------------------------------------------|
| <b>AA</b>              | --                                  | 0.76*/0.88*                          | 0.67*/0.46*                          | 0.36*/0.30                                       | 0.44*/0.66*                                      |
| <b>DHA</b>             | 0.76*/0.88*                         | --                                   | 0.60*/0.43*                          | 0.23/0.14                                        | 0.43*/0.66*                                      |
| <b>EPA</b>             | 0.67*/0.46*                         | 0.60*/0.43*                          | --                                   | 0.32*/0.27                                       | 0.26/0.42*                                       |
| <b>PGE<sub>2</sub></b> | 0.36*/0.30                          | 0.23/0.14                            | 0.32*/0.27                           | --                                               | 0.38*/0.39*                                      |
| <b>HxA<sub>3</sub></b> | 0.44*/0.66*                         | 0.43*/0.66*                          | 0.26/0.42*                           | 0.38*/0.39*                                      | --                                               |

\*p-value<0.05

AA= Arachidonic acid; DHA=docosahexaenoic acid;

EPA=eicosapentaenoic acid; PGE<sub>2</sub>=prostaglandin E<sub>2</sub>; HxA<sub>3</sub>=hepoxilin A<sub>3</sub>
