# Supplementary material for: ω-3 Tear Film Lipids Correlate With Clinical Measures of Dry Eye
Source: PubMed Central journal article supplement — Invest Ophthalmol Vis Sci. 2016 May 3;57(6):2472–8. doi: 10.1167/iovs.16-19131 (PMC4857833; doi:10.1167/iovs.16-19131), 2016-05-03
Supplement: i1552-5783-57-6-2472-s02.pdf [file i1552-5783-57-6-2472-s02.pdf]

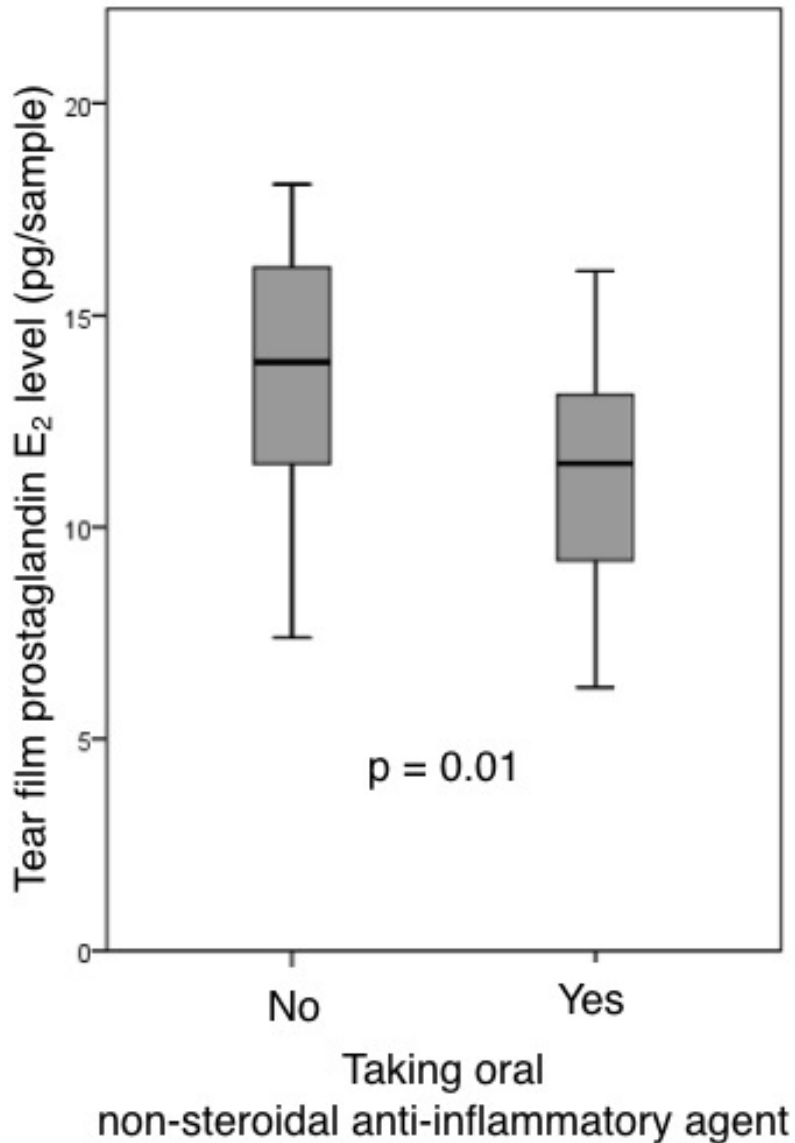

**Supplementary Figure 1:** Box-and-whisker plot comparing tear film prostaglandin E<sub>2</sub> levels in patients taking non-steroidal anti-inflammatory agents versus those who were not. Gray boxes represent the interquartile range between the 25th to 75th percentile, middle line represents the median, vertical line extends from the minimum to the maximum value.
